# Supplementary material for: Physical Plasma-Treated Skin Cancer Cells Amplify Tumor Cytotoxicity of Human Natural Killer (NK) Cells
Source: PubMed Central journal article supplement (PMC7761052; doi:10.3390/cancers12123575), 2020-11-30
Supplement: cancers-12-03575-s001.pdf [file cancers-12-03575-s001.pdf]

## Supplementary Materials:

# Physical Plasma-Treated Skin Cancer Cells Amplify Tumor Cytotoxicity of Human Natural Killer (NK) Cells

Ramona Clemen, Pepijn Heirman, Abraham Lin, Annemie Bogaerts and Sander Beksusch

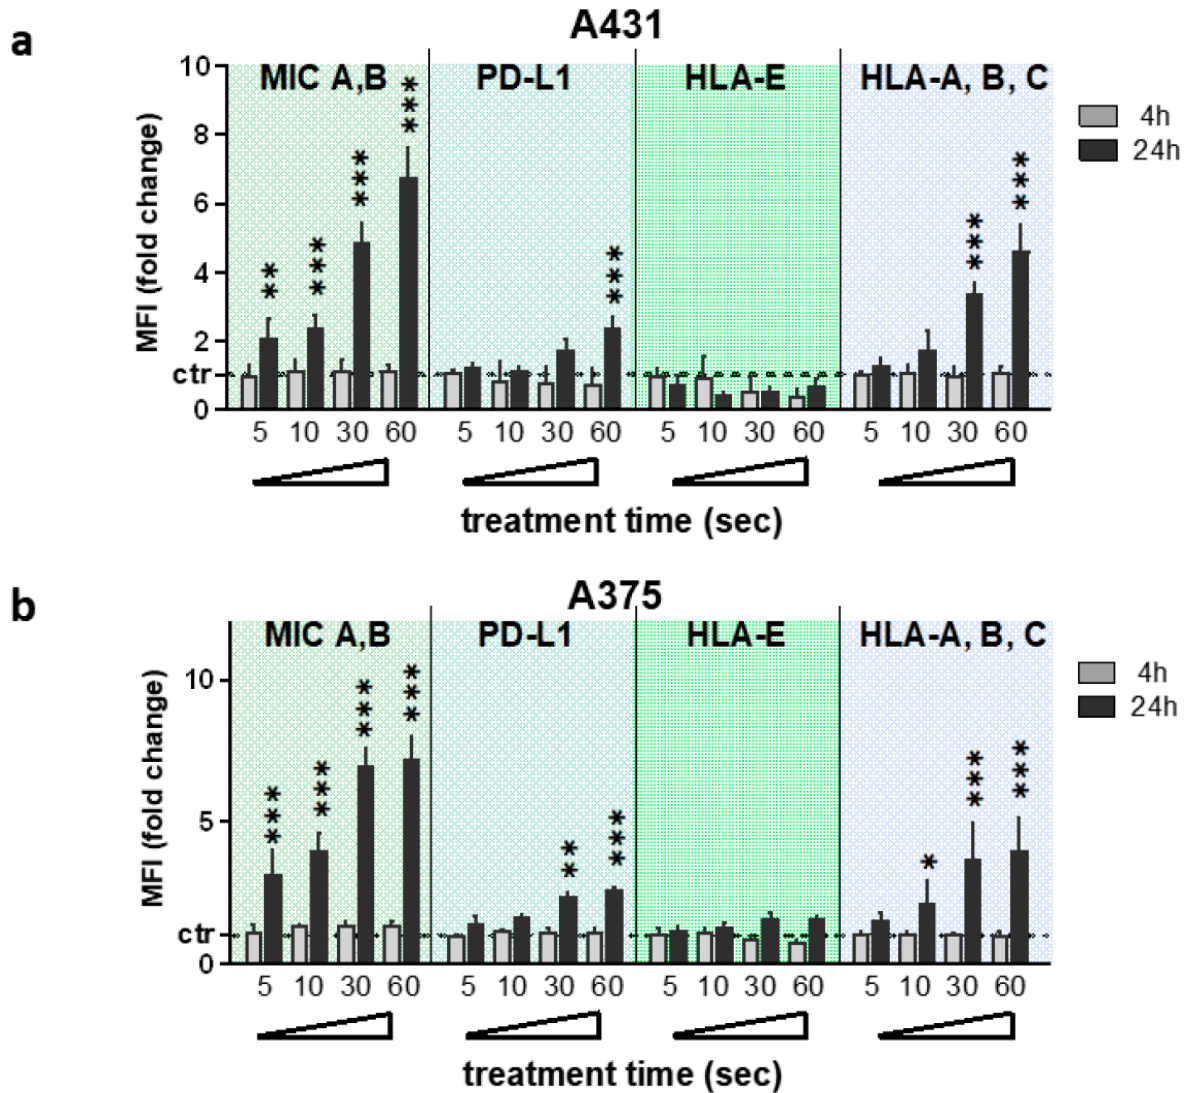

**C**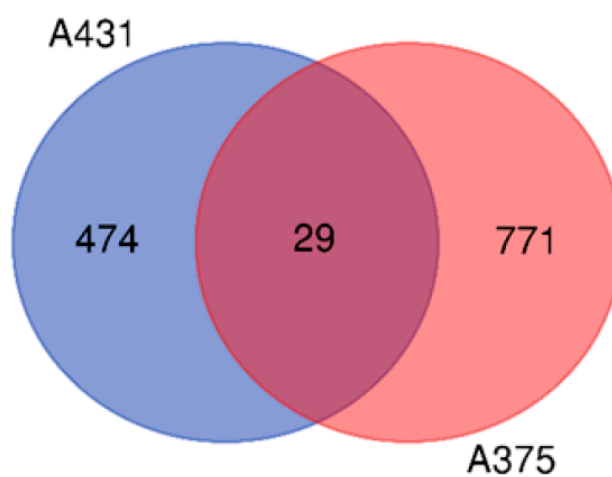

**Figure S1.** (a,b) surface marker expression on dead A431 (a) and A375 (b) cells 4h and 24h after exposure to plasma as determined using flow cytometry; (c) VENN diagram of mutations in A431 cells as compared to A375 cells as retrieved from <https://portals.broadinstitute.org/ccle>. Data are mean of three independent experiments. Statistical analysis was performed using one-way ANOVA (\* =  $p < 0.01$ , \*\* =  $p < 0.01$ , \*\*\* =  $p < 0.001$ ). MFI = mean fluorescent intensity.
